# Supplementary material for: Introducing a protective interlayer of TiO2 in Cu2O–CuO heterojunction thin film as a highly stable visible light photocathode
Source: Royal Society of Chemistry journal article supplement (doi:10.1039/c4ra13464h), 2014-12-11
Supplement: c4ra13464h1.pdf [file c4ra13464h1.pdf]

## Electronic Supplementary Information

### Introducing a protective interlayer of $\text{TiO}_2$ in $\text{Cu}_2\text{O}$ - $\text{CuO}$ heterojunction thin film as a highly stable visible photocathode

Peng Wang<sup>a</sup>, Xiaoming Wen<sup>b</sup>, Rose Amal<sup>\*a</sup> and Yun Hau Ng<sup>\*a</sup>

<sup>a</sup>Particles and Catalysis Research Group, School of Chemical Engineering, The University of New South Wales, Sydney NSW 2052, Australia.

<sup>b</sup>School of Photovoltaics and Renewable Energy Engineering, The University of New South Wales, Sydney NSW 2052, Australia.

Corresponding author: Y. H. Ng ([yh.ng@unsw.edu.au](mailto:yh.ng@unsw.edu.au)), R. Amal ([r.amal@unsw.edu.au](mailto:r.amal@unsw.edu.au))

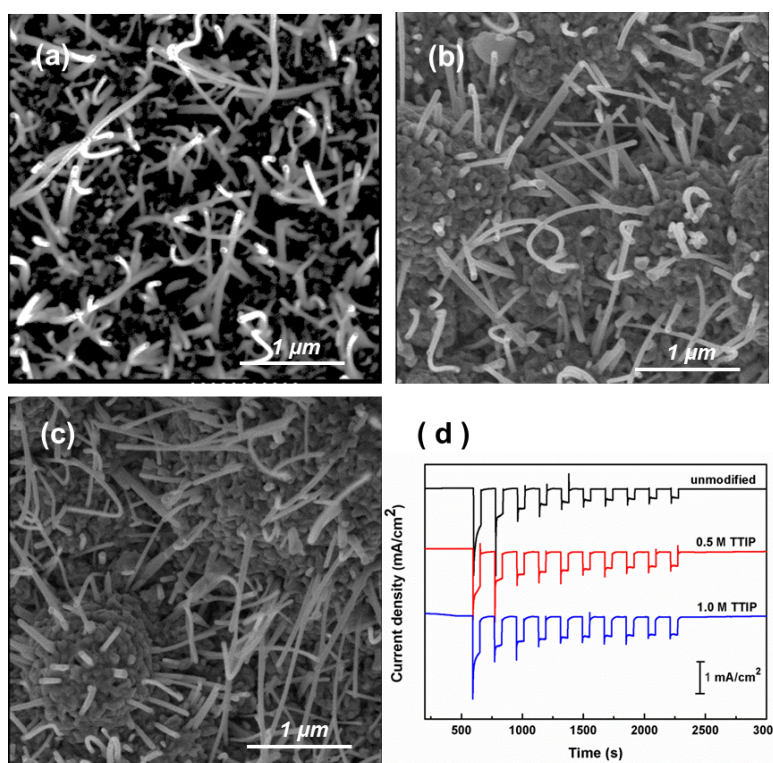

ESI Fig. S1 SEM images of (a) unmodified  $\text{Cu}_2\text{O}$ - $\text{CuO}$  photoelectrodes; (b)  $\text{TiO}_2$ -modified  $\text{Cu}_2\text{O}$ - $\text{CuO}$  photoelectrodes with 0.5 M  $\text{TiO}_2$  precursor and (c) 1.0 M  $\text{TiO}_2$  precursor; (d) corresponding visible light (>420 nm) photocurrent generation.

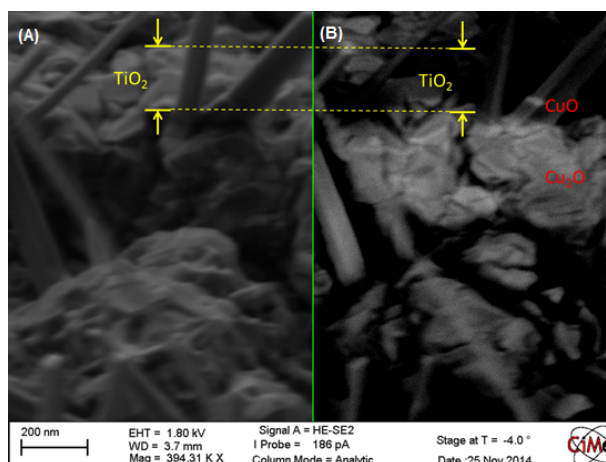

ESI Fig. S2 Scanning electron and back scattered electron images of Cu<sub>2</sub>O-CuO thin film coated with TiO<sub>2</sub> for 30 mins.

The thickness of TiO<sub>2</sub> layer (30 min treatment) was estimated using a 45° tilted back scattered electrons (BSE) imaging obtained on a Zeiss MERLIN microscope. **Figure A** shows the morphology of the film surface consists of TiO<sub>2</sub>, Cu<sub>2</sub>O and CuO nanowire components. The TiO<sub>2</sub> component can be distinguished in the right image (**Figure B**) which was formed from the back scattered electrons. It shows the presence of Cu element in brighter colour and Ti element in dark colour. The thickness of the TiO<sub>2</sub> was therefore estimated to be ca. 140 nm.

Note that the thickness of TiO<sub>2</sub> across the thin film's surface may not be evenly distributed due to the nature of the dip-coating method. In this work, indeed, we did not consider the TiO<sub>2</sub> thickness (as we understood it would be much thinner compare with the bulk Cu<sub>2</sub>O layer (ca. 20 μm)) as critical as the TiO<sub>2</sub> coverage on the surface. The level of TiO<sub>2</sub> coverage indicated in the **Figure 3** in the original manuscript was found important in determining its protective effectiveness against the redox reactions at the Cu<sub>2</sub>O-electrolyte interface.

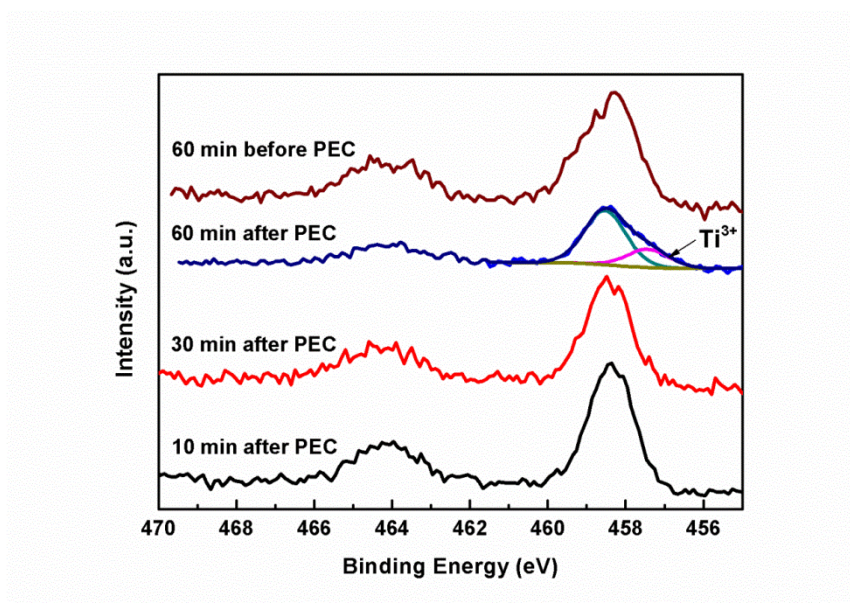

ESI Fig. S3 Ti 2p spectra of Cu<sub>2</sub>O-CuO photoelectrodes modified with precursor of TiO<sub>2</sub> at different duration (10 min, 30 min and 60 min).
